# Supplementary material for: MCD diet-induced steatohepatitis generates a diurnal rhythm of associated biomarkers and worsens liver injury in Klf10 deficient mice
Source: PubMed Central journal article supplement (PMC7376252; doi:10.1038/s41598-020-69085-w), 2020-07-22
Supplement: 41598_2020_69085_MOESM1_ESM.pdf [file 41598_2020_69085_MOESM1_ESM.pdf]

**MCD Diet-induced steatohepatitis generates a diurnal rhythm of associated biomarkers and worsens liver injury of *Klf10* deficient mice**

Pierre S. Leclère (1,2), Déborah Rousseau (2), Stéphanie Patouraux (3), Sophie Guérin (1), Stéphanie Bonnafous (3), Aline Gréchez-Cassiau (1), Anthony A Ruberto (1), Carmelo Luci (2), Malayannan Subramaniam (4), Albert Tran (3), Franck Delaunay (1), Philippe Gual (2)\*<sup>§</sup>, Michèle Teboul (1)\*<sup>§</sup>

*(1) Université Côte d'Azur, CNRS, INSERM, iBV, Nice, France*

*(2) Université Côte d'Azur, INSERM, C3M, Nice, France*

*(3) Université Côte d'Azur, CHU, INSERM, C3M, Nice, France*

*(4) Department of Biochemistry and Molecular Biology, Mayo Clinic, Rochester, MN, USA.*

§ Shared last author

\* Corresponding author

**Philippe Gual**

[Philippe.gual@inserm.fr](mailto:Philippe.gual@inserm.fr)

**Michèle Teboul :**

[Michele.TEBOUL@univ-cotedazur.fr](mailto:Michele.TEBOUL@univ-cotedazur.fr)

## Supplementary Methods

**Real-time quantitative PCR analysis:** TaqMan gene expression assays were purchased from Thermo Fisher Scientific Inc.: *B2m* (Mm00437762\_m1); *Klf10* (Mm00449812\_m1); *Cidec* (Mm00617672\_m1); *Pnpla2* (Mm00503040\_m1); *Tnfa* (Mm00443258\_m1); *Ccl2* (Mm00441242\_m1) ; *Tgf $\beta$ 1* (Mm03024053\_m1) ; *Colla1* (Mm00801666\_g1) ; *Timp1* (Mm00441818\_m1) ; *Klf4* (Mm00516104\_m1); *Klf6* (Mm00516184\_m1) *Klf11*(Mm00462958). ; *Il-6* (Mm00446190\_m1) ; *Ikb* (Mm00456849\_m1).

Primers for SYBR green approach: *B2m* F: TGCTATCCAGAAAACCCCTCAA, R: GGGGTGAATTCAGTGTGAGCC; *Klf10* F: AGTGACTTTGAAGCGGTGGA, R: AAGGTGCGTTAAACAAAATGC; *Bmal1* F: CTCATTGATGCCAAGACTGG, R: GGTGGCCAGCTTTTCAAATA; *Rev-erba*: F: AACCTCCAGTTTGTGTCAAGGT, R: GATGACGATGATGCAGAAGAAG; *Rev-erb $\beta$* : F: TTCCAGTAGGTGGATGTTCTCA, R: CTGCTGGGGTAAACTCATTG; *Rorc*: F: TTTTGAGGAAACCAGGCATC, R: CCACATCTCCCACATTGACTTC; *Dbp*: F: CTGAGGAACAGAAGGATGAGAAG, R: GTAGCGTGAAAGCACAGCAC.

**Mouse primary hepatocytes preparation.** Mouse hepatocytes were isolated with a two-step collagenase procedure. Briefly, mouse livers were perfused with HEPES buffer containing 8 g/l NaCl, 33mg/l Na<sub>2</sub>HPO<sub>4</sub>, 200 mg/l KCl and 2.38 g/l HEPES, pH 7.5, supplemented with 0.5mM EGTA for 3min at 3ml/min, then with HEPES buffer for 3 min at 3ml/min and finally with HEPES buffer supplemented with 1.5 g/l CaCl<sub>2</sub> and 0.026% collagenase type IV (#C5138) (Sigma-Aldrich; Saint-Quentin-Fallavier, FR) for 7 min at 3 ml/min. Livers were then carefully removed and minced in Williams' E medium (Life Technologies, St Aubin, FR) supplemented with 10% fetal bovine serum (PAA Laboratories, Velizy-Villacoublay, FR), 100 units/ml penicillin, 100 mg/ml streptomycin, 2mM L-glutamine and 0.02 UI/ml insulin (Umulin, Lilly France, Neuilly-sur-Seine, FR). The cell suspension was then filtered (100  $\mu$ m) and hepatocytes were collected by centrifugation at 50 x g for 5 min. Viability was evaluated by trypan blue exclusion (Sigma-Aldrich, Saint-Quentin-Fallavier, FR).

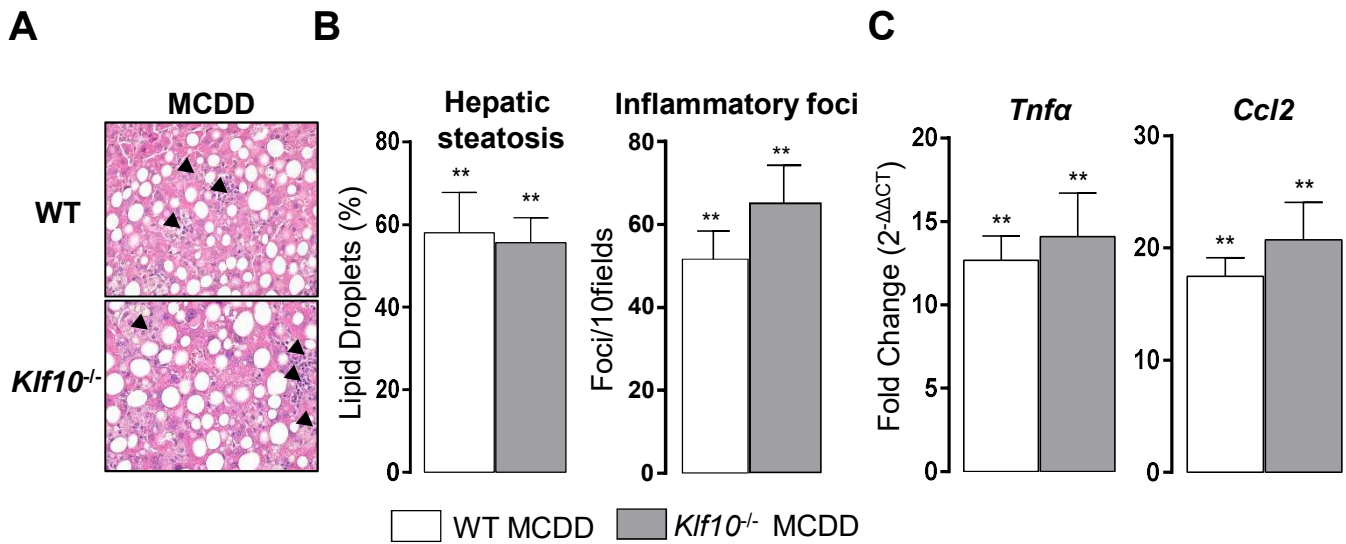

**Fig. S1** *Klf10* deficiency does not impact the development of hepatic steatosis and inflammation during steatohepatitis in mice sampled at ZT9. WT and *Klf10*<sup>-/-</sup> male mice were fed a methionine and choline deficient diet (MCDD) for 4 weeks and sacrificed at ZT9 (n=9 mice/ group). (A) Representative images, showing the presence of lipid droplets and inflammatory foci (black arrows), from H&E stained liver sections of WT and *Klf10*<sup>-/-</sup> upon MCDD. (B) Quantification of hepatic steatosis and inflammatory foci from H&E stained liver sections. (C) Hepatic expression of *Tnfa* and *Ccl2*. All the data are expressed as mean ± SEM. The mRNA levels are normalized to *B2m* and expressed relative the CD level ZT9 (n=3). Statistical significance was tested using the Mann-Whitney test, \*\* p<0.01.

**A**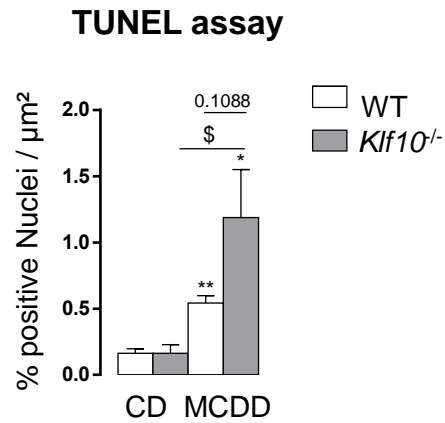**B**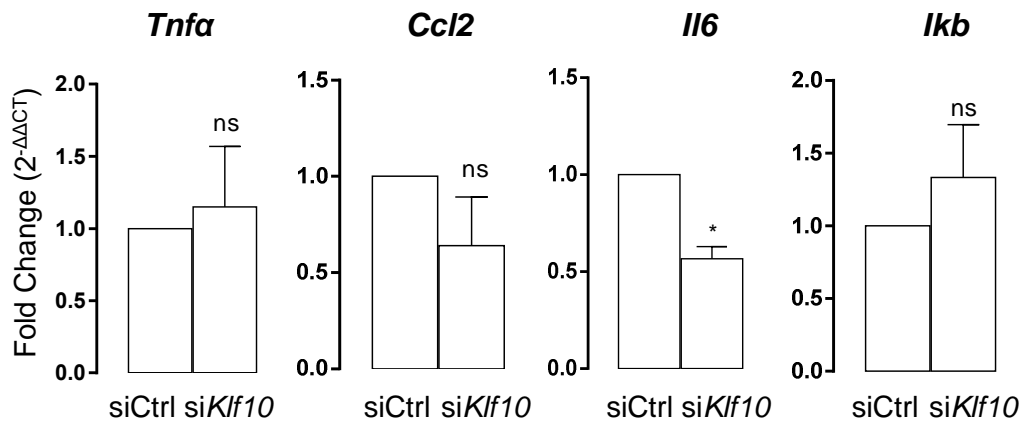**C**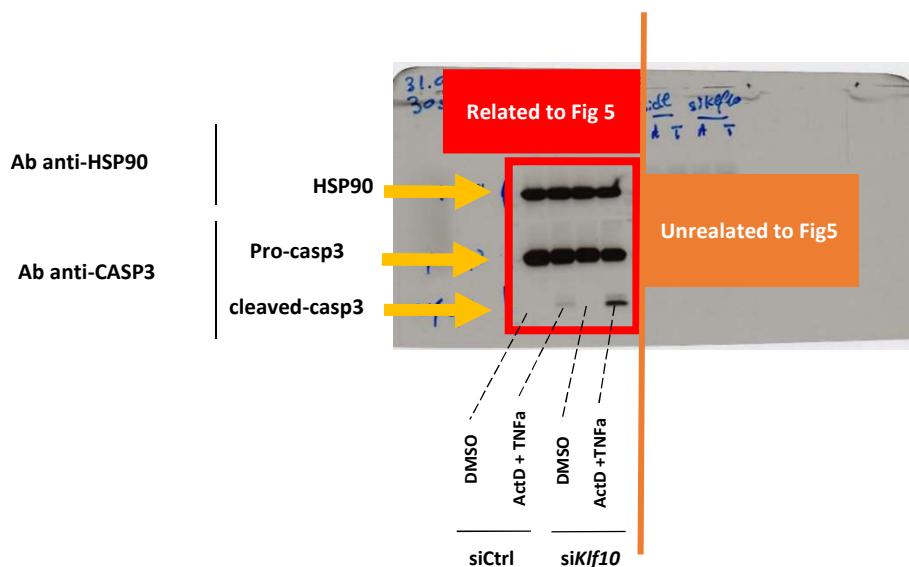

**Fig. S2 *Klf10* deficient mice may display increased hepatic apoptotic cells upon MCDD challenge.**

(A) quantification of the TUNEL assay performed on liver sections of WT and *Klf10*<sup>-/-</sup> mice fed a CD or MCDD and sacrificed at ZT3 (n=3-10 mice /group). (B) Mouse primary hepatocytes were transfected with control (siCtrl) or *Klf10* (si*Klf10*) siRNA. Gene expression of *Tnfa*, *Ccl2*, *Il6* and *Ikb* were evaluated. Gene expression was normalized to *B2m* and expressed as relative expression of the untreated siCtrl condition, 72h after transfection (n=4). (C) Corresponding uncropped image of the western blot shown in Fig. 5d. All the data are expressed as mean  $\pm$  SEM. Statistical significance was tested using the Mann-Whiney test vs the control group (stars) or the indicated groups (dollar symbols), \*\* p<0.01; \* and \$ p<0.05.

| Items                                | Diet | Mean level             | Amplitude            | Acrophase (ZT : min)  |
|--------------------------------------|------|------------------------|----------------------|-----------------------|
| Steatosis (%)                        | CD   | ND                     | ND                   | ND                    |
|                                      | MCDD | 12.10 (7.83 ; 16.42)*  | 13.19 (7.32 ; 19.25) | 08:07 (06:19 ; 10:06) |
| Inflammatory foci (foci / 10 fields) | CD   | ND                     | ND                   | ND                    |
|                                      | MCDD | 12.49 (7.08 ; 19.10)*  | 12.27 (3.72 ; 21.08) | 07:38 (04:24 ; 11:08) |
| Hepatic TG (mg/g of liver)           | CD   | 2.98 (2.47 ; 3.58)     | 1.59 (0.87 ; 2.35)   | 14.27 (12.19 ; 16.36) |
|                                      | MCDD | 7.35 (5.59 ; 9.49)*    | NSR                  | NSR                   |
| ALT (IU/L)                           | CD   | 20.02 (16.36 ; 25.13)  | NSR                  | NSR                   |
|                                      | MCDD | 84.20 (74.35 ; 94.92)* | NSR                  | NSR                   |
| AST (IU/L)                           | CD   | 202 (179 ; 227)        | NSR                  | NSR                   |
|                                      | MCDD | 620 (553 ; 689)        | 307 (211 ; 400)      | 00:57 (00:15 ; 02:00) |
| <i>Pnpla2</i>                        | CD   | 1.08 (0.93 ; 1.24)     | 0.43 (0.20 ; 0.64)   | 08:35 (06:29 ; 10:46) |
|                                      | MCDD | 2.02 (1.79 ; 2.30)*    | 0.66 (0.30 ; 1.01)   | 08:44 (06:22 ; 10:59) |
| <i>Fsp27/Cidec</i>                   | CD   | 1.28 (0.85 ; 1.75)     | NSR                  | NSR                   |
|                                      | MCDD | 17.96 (14.90 ; 20.92)  | 7.73 (3.73 ; 11.93)  | 06:25 (04:04 ; 08:31) |
| <i>Tnfa</i>                          | CD   | 1.20 (1.00 ; 1.43)     | NSR                  | NSR                   |
|                                      | MCDD | 8.73 (7.01 ; 10.78)*   | 5.77 (3.21 ; 8.39)   | 4:26 (02:19 ; 06:13)  |
| <i>Ccl2</i>                          | CD   | 0.88 (0.49 ; 1.48)     | NSR                  | NSR                   |
|                                      | MCDD | 6.73 (5.40 ; 8.29)*    | 4.55 (2.61 ; 6.53)   | 02:20 (00:32 ; 04:11) |
| <i>Tgfb1</i>                         | CD   | 0.82 (0.72 ; 0.92)     | NSR                  | NSR                   |
|                                      | MCDD | 2.02 (1.79 ; 2.24)*    | NSR                  | NSR                   |
| <i>Colla1</i>                        | CD   | 1.00 (0.78 ; 1.20)     | NSR                  | NSR                   |
|                                      | MCDD | 3.63 (2.81 ; 4.49)*    | 1.89 (0.72 ; 3.15)   | 06:42 (03:44 ; 09:15) |
| <i>Timp1</i>                         | CD   | 1.11 (0.69 ; 1.57)     | NSR                  | NSR                   |
|                                      | MCDD | 13.41 (10.05 ; 16.85)* | 8.00 (3.36 ; 12.57)  | 06:02 (03:16 ; 08:27) |

**Table S1. NAFLD features cosinor analysis**

Bootstrap analysis was performed to generate the 95% confidence intervals. \* indicates statistical difference between CD and MCDD fed mice ( $p < 0.05$ ). NSR, not significantly rhythmic, ND, not detectable.

| Gene            | Diet | Mean level          | Amplitude           | Acrophase (ZT : min)   |
|-----------------|------|---------------------|---------------------|------------------------|
| <i>Bmal1</i>    | CD   | 0.83 (0.67 ; 1.00)  | 0.75 (0.52 ; 0.99)  | 22:20 (21:10 ; 23:35)  |
|                 | MCDD | 1.10 (0.96 ; 1.28)  | 1.21 ( 0.96 ; 1.46) | 19:12 (18:29 ; 19:54)* |
| <i>Rev-erba</i> | CD   | 0.43 (0.28 ; 0.61)  | 0.57 (0.33 ; 0.81)  | 04: 26 (02:44 ; 06:07) |
|                 | MCDD | 0.36 (0.22 ; 0.54)  | 0.56 (0.33 ; 0.80)  | 03:17 (01:38 ; 04:53)  |
| <i>Per2</i>     | CD   | 7.13 (5.58 ; 8.88)  | 7.63 (5.31 ; 9.97)  | 11:36 (10:22 ; 12:49)  |
|                 | MCDD | 7.68 (6.91 ; 8.47)  | 5.85 (4.74 ; 6.95)  | 10:34 (09:50 ; 11:16)  |
| <i>Cry1</i>     | CD   | 2.04 (1.65 ; 2.38)  | 1.64 (1.18 ; 2.12)  | 19:23 (18:10 ; 20:39)  |
|                 | MCDD | 2.22 (2.09 ; 2.37)  | 1.88 (1.69 ; 2.07)  | 16:26 (16:01 ; 16:50)* |
| <i>Rev-erbβ</i> | CD   | 0.78 (0.64 ; 0.95)  | 0.55 ( 0.34 ; 0.78) | 08:07 (06:31 ; 09:49)  |
|                 | MCDD | 0.47 (0.41 ; 0.54)* | 0.35 (0.26 ; 0.44)  | 08:19 (07:11 ; 09:23)  |
| <i>Rorc</i>     | CD   | 2.66 (2.27 ; 3.15)  | 1.16 ( 0.56 ; 1.77) | 15:53 (13:34 ; 18:02)  |
|                 | MCDD | 2.87 (2.63 ; 3.13)  | 2.44 (2.12 ; 2.78)* | 14:35 (13:58 ; 15:10)  |
| <i>Dbp</i>      | CD   | 1.69 (1.22 ; 2.19)  | 2.32 (1.69 ; 3.00)  | 07:44 (07:41 ; 09:56)  |
|                 | MCDD | 0.63 (0.47 ; 0.80)* | 0.88 (0.62 ; 1.14)* | 8:42 (07:33 ; 09:46)   |
| <i>Klf10</i>    | CD   | 1.99 (1.40 ; 2.67)  | 1.50 (0.59 ; 2.41)  | 9:23 (6:46 ; 12:00)    |
|                 | MCDD | 2.50 (2.06 ; 3.00)  | NSR                 | NSR                    |
| <i>Klf11</i>    | CD   | 0.70 (0.49 ; 0.97)  | 0.51 (0.18 ; 0.87)  | 02:57 (23:54 ; 05:58)  |
|                 | MCDD | 0.95 ( 0.83 ; 1.07) | 0.50 (0.34 ; 0.68)  | 01:31 (00:09 ; 2:52)   |
| <i>Klf4</i>     | CD   | 0.98 (0.78 ; 1.24)  | NSR                 | NSR                    |
|                 | MCDD | 2.64 (2.34 ; 2.94)* | NSR                 | NSR                    |
| <i>Klf6</i>     | CD   | 0.88 (0.75 ; 1.03)  | NSR                 | NSR                    |
|                 | MCDD | 4.19 (3.68 ; 4.71)* | 1.66 (0.97 ; 2.41)  | 01:17 (23:30 ; 03:06)  |

**Table S2. Liver clock genes cosinor analysis**

Bootstrap analysis was performed to generate the 95% confidence intervals. \* indicates statistical difference between CD and MCDD fed mice ( $p < 0.05$ ). NSR, not significantly rhythmic.

| Gene         | Diet | Mean level          | Amplitude           | Acrophase (ZT : min)    |
|--------------|------|---------------------|---------------------|-------------------------|
| <i>Bmal1</i> | CD   | 0.88 (0.66 ; 1.11)  | 0.64 (0.32 ; 0.97)  | 21:15 (19:09 ; 23:17)   |
|              | MCDD | 1.06 ( 0.96 ; 1.18) | 1.03 (0.87 ; 1.18)  | 18:19 (17:44 ; 18:53)*  |
| <i>Nr1d1</i> | CD   | 0.68 ( 0.53 ; 0.85) | 0.46 (0.24 ; 0.70)  | 7:03 ( 05:07 ; 08:52)   |
|              | MCDD | 0.63 (0.46 ; 0.90)  | 0.94 (0.60 ; 1.29)  | 03:29 (02:04 ; 04:54)*  |
| <i>Per2</i>  | CD   | 1.41 (1.15 ; 1.66)  | 0.93 (0.57 ; 1.29)  | 13:18 (11:29 ; 14:39)   |
|              | MCDD | 1.44 (0.97 ; 2.04)  | 1.24 (0.48 ; 2.02)  | 08:45 (06:02 ; 11:18)*  |
| <i>Cry1</i>  | CD   | 4.11 (3.24 ; 4.97)  | 3.77 (2.58 ; 4.93)  | 16:19 (14:59 ; 17:37)   |
|              | MCDD | 8.68 (5.67 ; 3.22)* | 8.28 ( 3.65 ; 4.06) | 10:38 ( 07:44 ; 13:29)* |
| <i>Nr1d2</i> | CD   | 0.88 (0.77 ; 1.00)  | 0.46 (0.29 ; 0.62)  | 08:59 (07:38 ; 10:16)   |
|              | MCDD | 1.09 (0.67 ; 1.68)  | 1.23 (0.51 ; 1.93)  | 05:52 ( 03:00 ; 08:15)  |
| <i>Rorc</i>  | CD   | 2.39 (2.46 ; 3.51)  | 2.54 (1.85 ; 3.24)  | 16:30 (15:15 ; 17:36)   |
|              | MCDD | 3.38 (3.17 ; 4.76)  | 2.2 (1.11 ; 3.38)   | 13:07 (11:03 ; 15:28)   |
| <i>Dbp</i>   | CD   | 1.77 (51.38 ; 2.15) | 2.01 ( 1.44 ; 2.60) | 09:41 ( 08:40 ; 10:43)  |
|              | MCDD | 2.22 (1.88 ; 2.57)  | 2.68 (2.20; 3.19)   | 05:49 (05:08 ; 06:29)*  |
| <i>Klf10</i> | CD   | 2.02 (1.71 ; 2.35)  | 1.18 (0.77 ; 1.59)  | 14:41 (13: 07 ; 16:22)  |
|              | MCDD | 2.15 ( 1.71 ; 2.67) | NSR                 | NSR                     |
| <i>Klf11</i> | CD   | 0.68 (0.56 ; 0.83)  | 0.33 (0.16 ; 0.51)  | 03:15 (00:36 ; 05:42)   |
|              | MCDD | 0.85 (0.69; 1.02)   | 0.60 (0.37; 0.83)   | 03:34 ( 01: 55; 05:03)  |

**Table S3. Kidney clock genes cosinor analysis**

Bootstrap analysis was performed to generate the 95% confidence intervals. \* indicates statistical difference between CD and MCDD fed mice ( $p < 0.05$ ). NSR, not significantly rhythmic.
